# Supplementary material for: One-step synthesis of Fe3O4@C nanotubes for the immobilization of adriamycin
Source: Royal Society of Chemistry journal article supplement (doi:10.1039/c1jm12535d), 2011-01-01

## Supporting Information

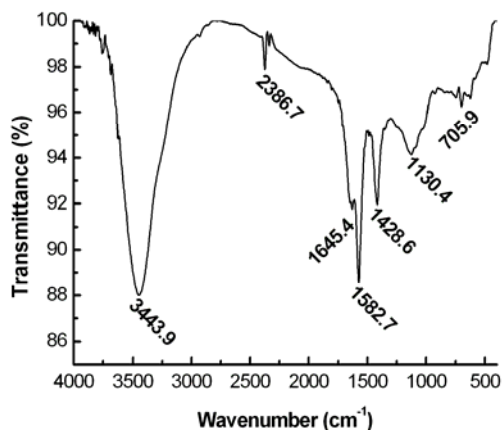

Figure S10 FTIR spectra of graphite oxide (GO) sheets

GO sheets were prepared by a modified Hummers method (Refs. 21 and 22). The concentration of GO (1 mg/mL) was determined by measuring the mass of the GO dried from a certain volume of GO suspensions. The FTIR spectra were recorded on a Perkin Elmer Paragon-1000 spectrometer in the wavenumber range of 400–4000 cm<sup>-1</sup>. 1 μL GO solution (1 mg/mL) was dipped on the surface of KBr pellets, and then the KBr pellets were dried by a Fourier infrared light for 1 h. Intense peak at 3443.9 cm<sup>-1</sup> is assigned to the O–H stretching vibrations. The peak at 1645.4 cm<sup>-1</sup> is attributed to the C=O stretching vibrations from carbonyl and carboxylic groups. The peaks at 1582.7, 1428.6 and 1130.4 cm<sup>-1</sup> are assigned to the skeletal vibrations from unoxidized graphitic domain, C–OH stretching vibrations and C–O stretching vibrations, respectively. These active surface groups (e.g., –COOH, –OH and –C=O) may act as the nucleation sites for the Fe<sup>2+</sup> precipitates and then lead to homogeneous distribution of Fe<sup>2+</sup> precipitates on the surface of GO sheets.

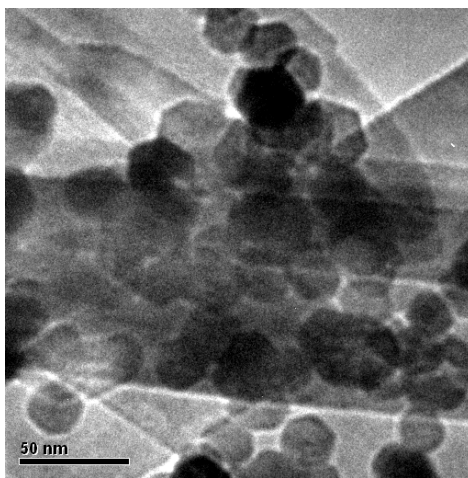

Figure S11 TEM image of the obtained products after hydrothermal reaction (200 °C, 10 h)

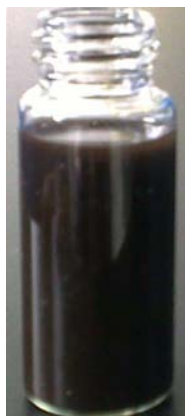

Figure S12 Visual image of  $\text{Fe}_3\text{O}_4@\text{C}$  nanotubes dispersed in deionized water

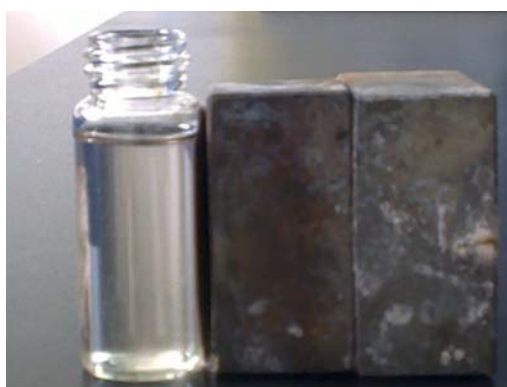

Figure S13 Separation of  $\text{Fe}_3\text{O}_4@\text{C}$  nanotubes by an external magnet

Figure S12 and Figure S13 suggest that the synthesized  $\text{Fe}_3\text{O}_4@\text{C}$  nanotubes have good water solubility. They can be easily homogeneously dispersed in deionized water and isolated by a magnet within several seconds.  $\text{Fe}_3\text{O}_4@\text{C}$  nanotubes materials can also redisperse quickly with a slight shake once the magnet is removed. It suggested that the  $\text{Fe}_3\text{O}_4@\text{C}$  nanotubes possess excellent magnetic responsivity and redispersibility, which is a prominent advantage to their applications.

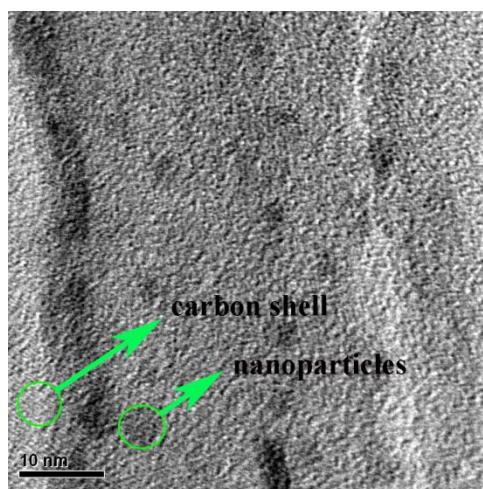

The sites for SAED analysis were signed as a ring (HRTEM in Figure 1f)

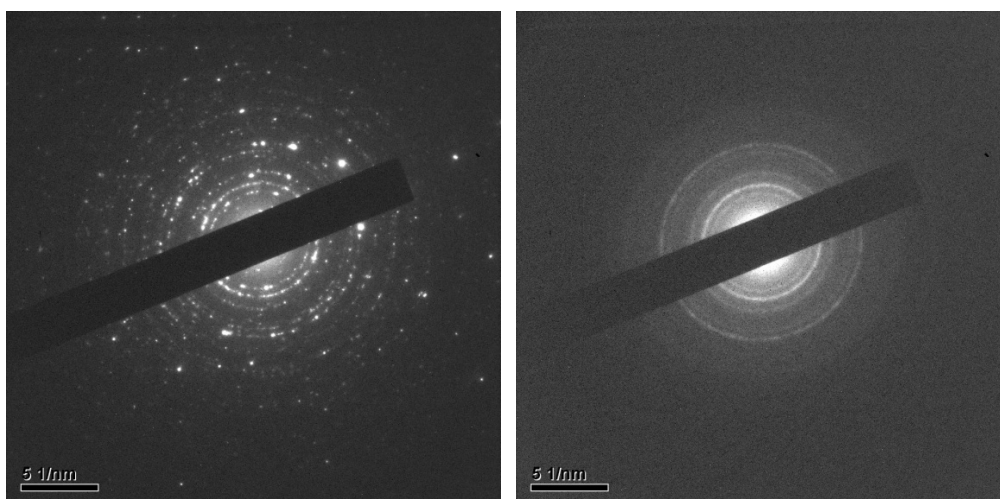

SAED patterns of inserted  $\text{Fe}_3\text{O}_4$  nanoparticles (Left, Figure S14) and carbon shell (right, Figure S15)

The carbon shell originated from GO sheets has many cavities due to the removal of oxygen functionalities after hydrothermal treatment. The exposed dark  $\text{Fe}_3\text{O}_4$  nanoparticles in Figure 1f are part of large  $\text{Fe}_3\text{O}_4$  particles inside the carbon shell. Since decomposition reaction of  $\text{Fe}^{2+}$  precipitates takes place in a homogeneous system, it may generate numerous dispersed  $\text{Fe}_3\text{O}_4$  nanoparticles. According to Figure S11, the average sizes of large  $\text{Fe}_3\text{O}_4$  particles inside the carbon shell were about 25-40 nm.

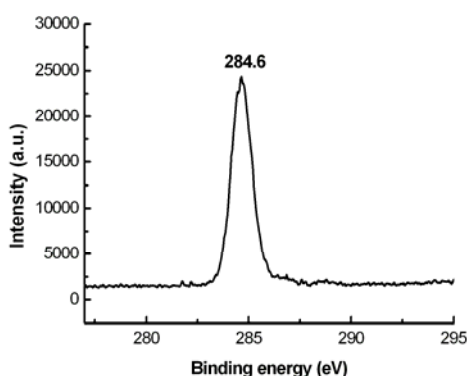

Figure S16 XPS spectra of C1s for the  $\text{Fe}_3\text{O}_4$ @C nanotubes

**S17-MTT assays:** As for vitro cellular study, healthy human gastric cells GES-1 were seeded into 96-well plates at a density of  $10^4$  in 100  $\mu\text{L}$  of medium per well and grown in RPMI 1640 cells medium supplemented with 10 % NCBS, 100 units/mL penicillin and 0.1 mg/mL streptomycin under standard conditions in a conventional incubator with 5 %  $\text{CO}_2$  at 37  $^\circ\text{C}$  overnight. The  $\text{Fe}_3\text{O}_4$ @C nanotubes were dispersed in cell culture medium after sterilization and obtained different concentrations of  $\text{Fe}_3\text{O}_4$ @C nanotubes (5, 10, 15 and 20  $\mu\text{g}/\text{mL}$ ). The cells were then treated with different concentrations of  $\text{Fe}_3\text{O}_4$ @C nanotubes respectively with 100  $\mu\text{L}$  per well and allowed for 36 hrs of incubation.

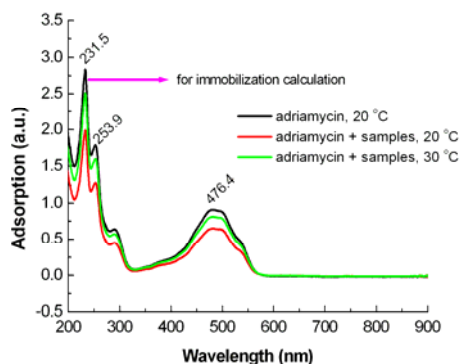

Figure S18 UV-vis spectrum of adriamycin solution before and after immobilization by the synthesized  $\text{Fe}_3\text{O}_4@\text{C}$  nanotubes.

**Adriamycin immobilization:** 2 mg  $\text{Fe}_3\text{O}_4@\text{C}$  nanotubes were dispersed in 0.8 mL adriamycin solution (1mg/mL). Then the mixture was diluted three times by deionized water, sealed in a 5 mL centrifuge tube dealt with different temperatures (20 and 30 °C) under gentle rotation for 15 min. After reaction, the  $\text{Fe}_3\text{O}_4@\text{C}$  nanotubes in solution were removed by a magnet, and the separated solution was used to the UV-vis absorption spectrum measurement. UV adsorption measurements were conducted on all the solution before and after immobilization by  $\text{Fe}_3\text{O}_4@\text{C}$  nanotubes. The amount of immobilized adriamycin was calculated by comparing the UV absorption value of adriamycin solution before and after immobilization. UV-vis absorption spectra of samples were measured on a Shimadzu UV-2450 spectrophotometer at a wavelength of 500 nm.

## Enlarged figures used in this manuscript

**Figure 1:**

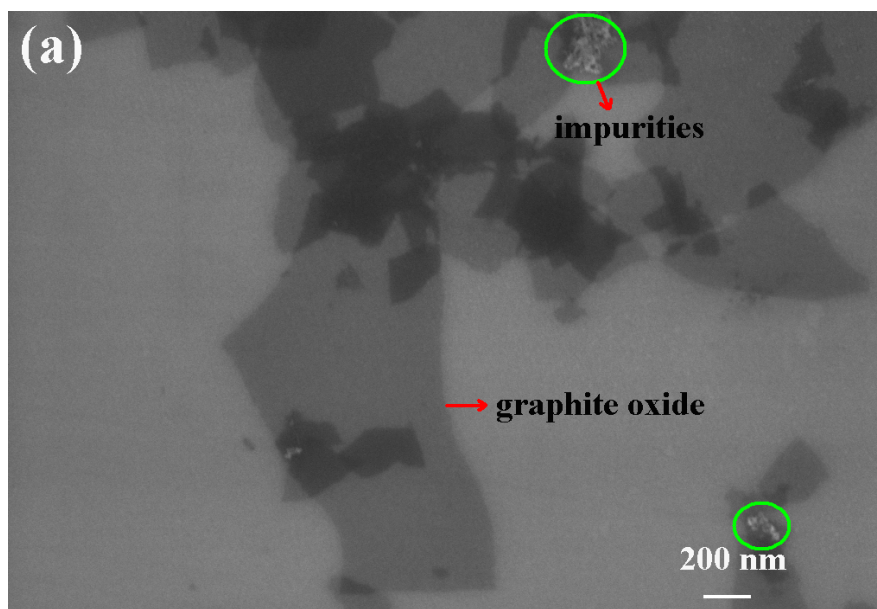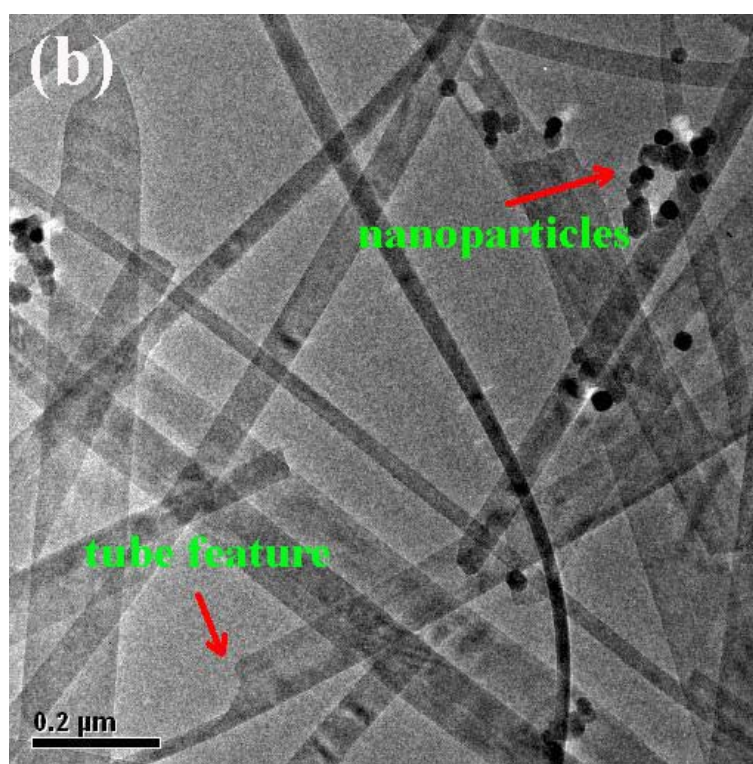

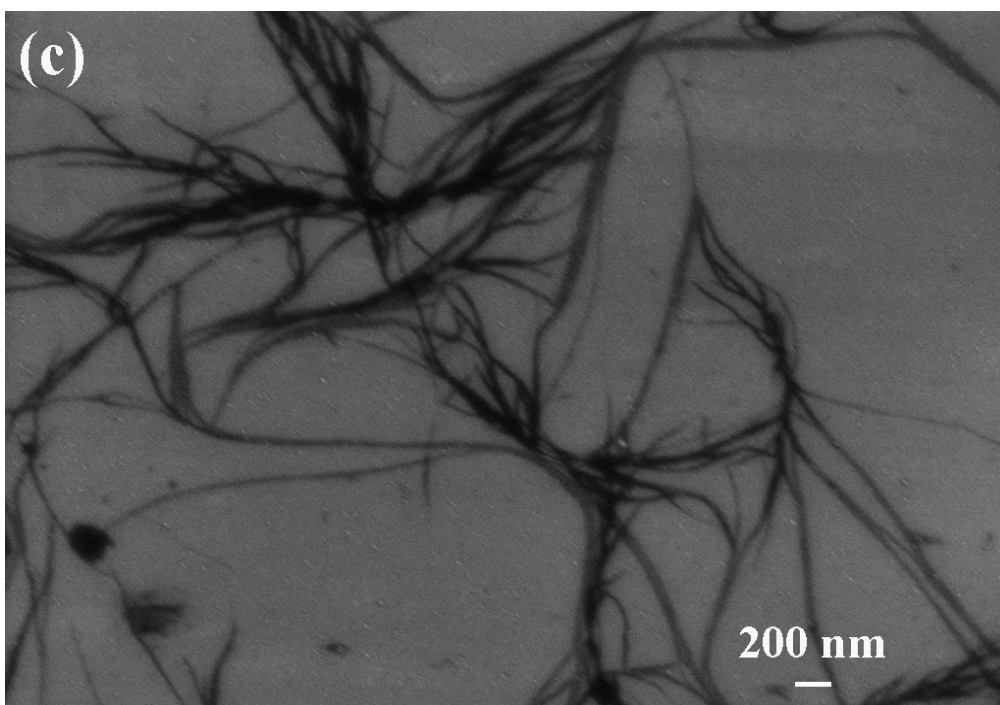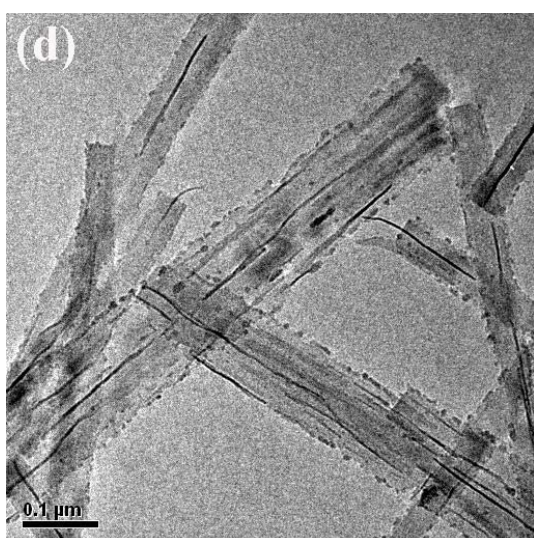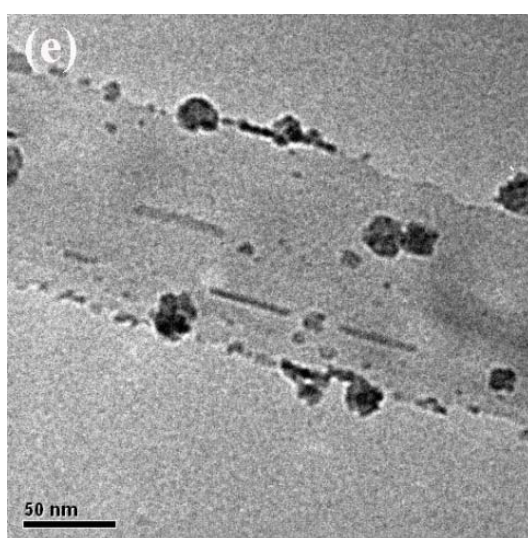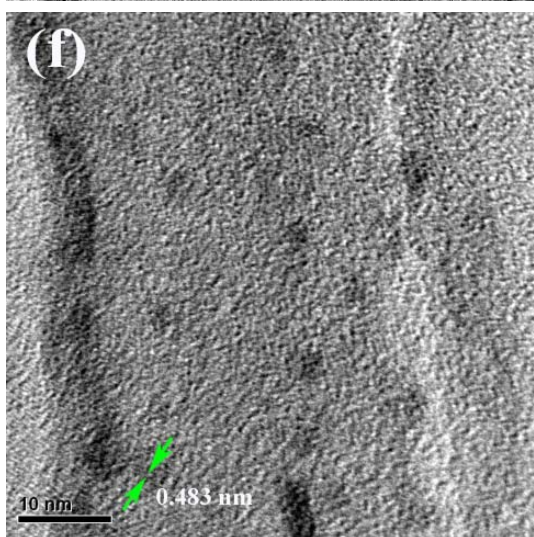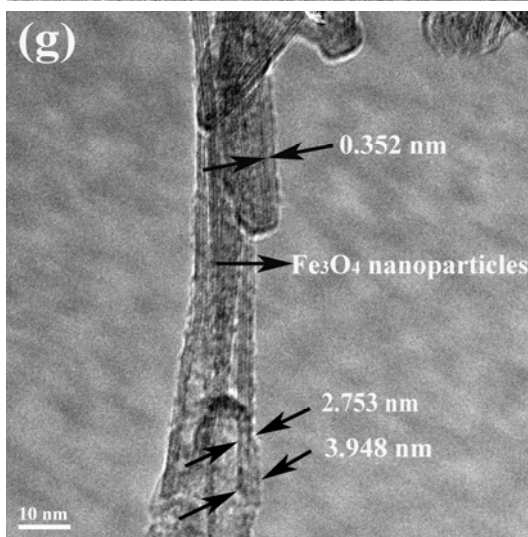

Figure 2:

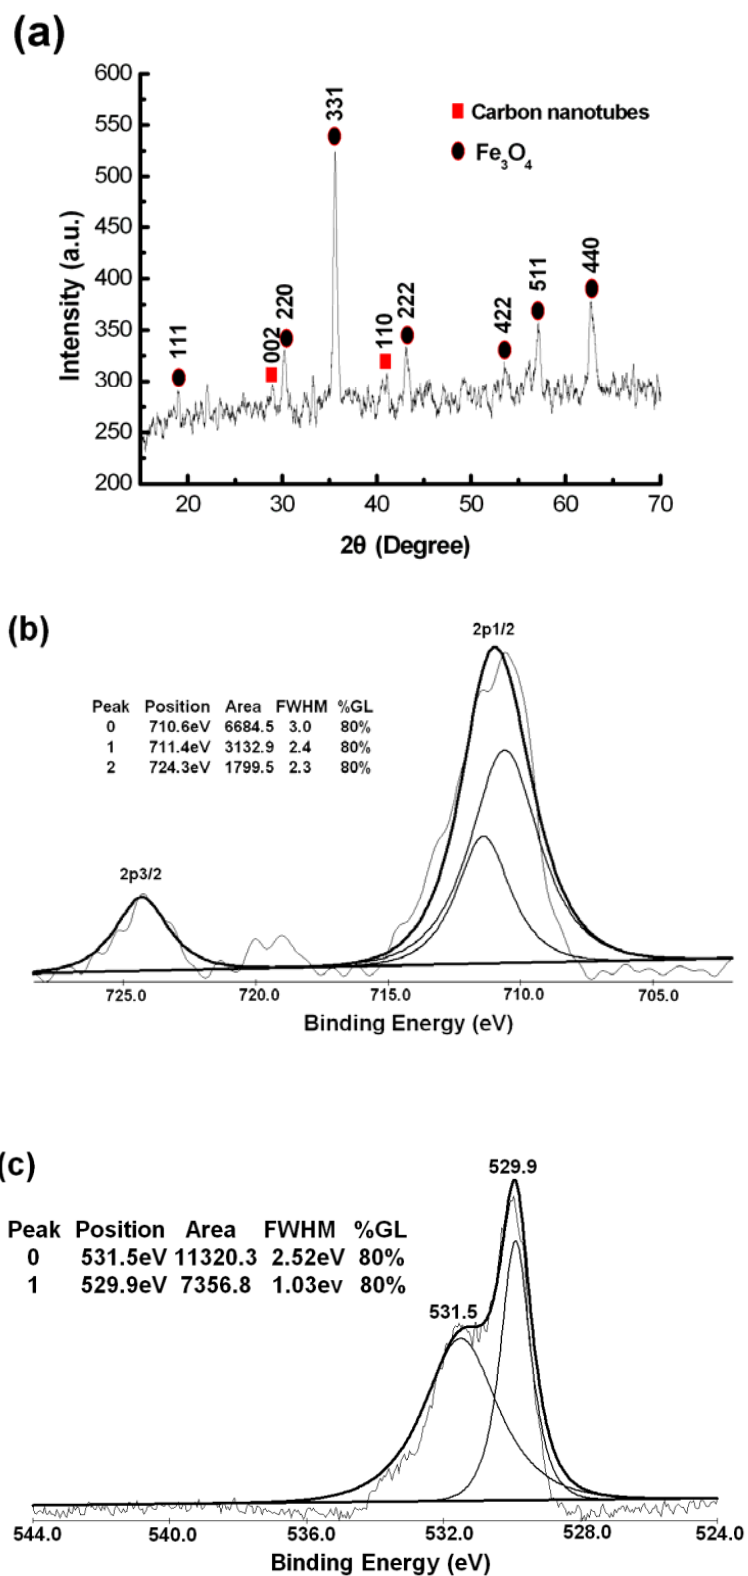

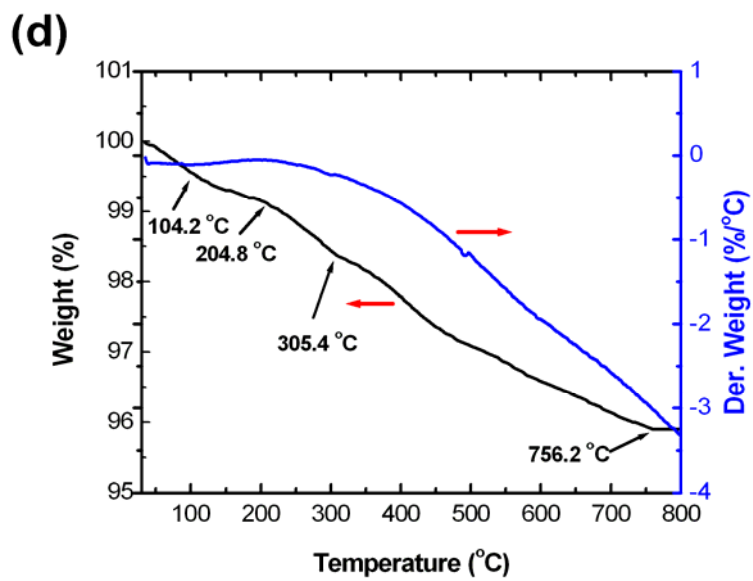

Figure 3:

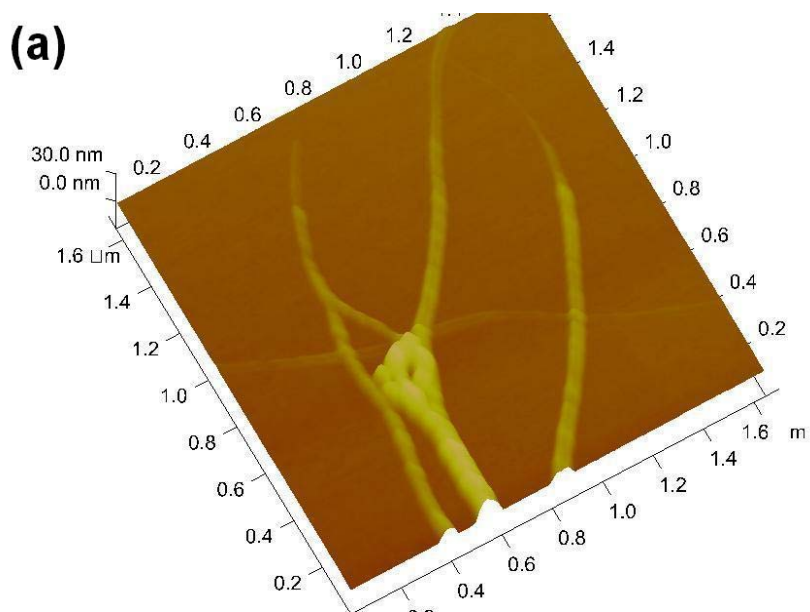



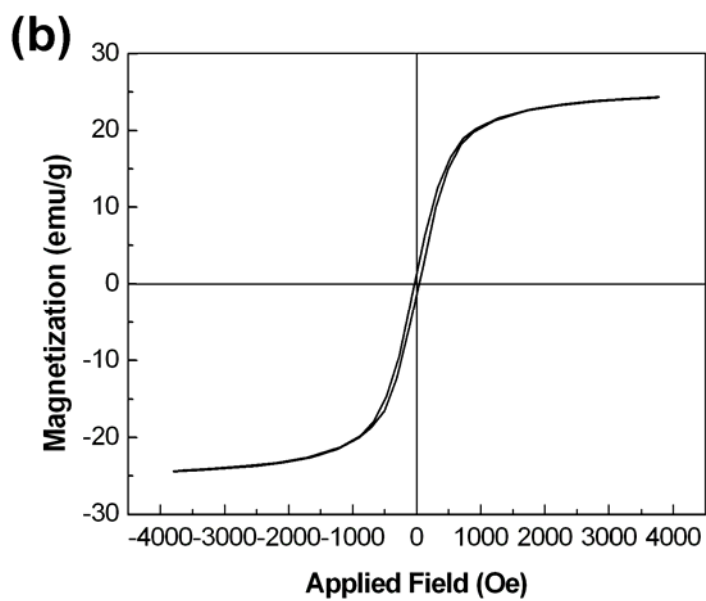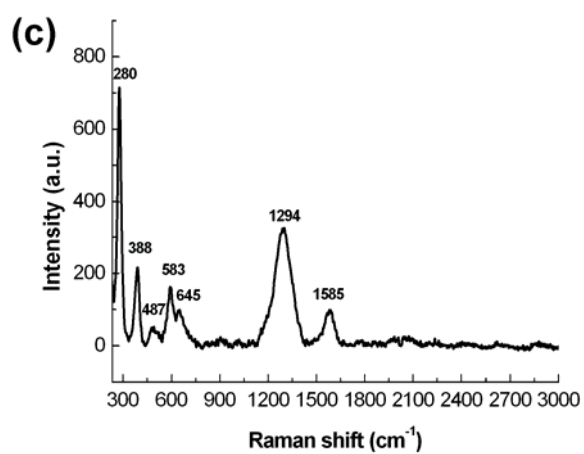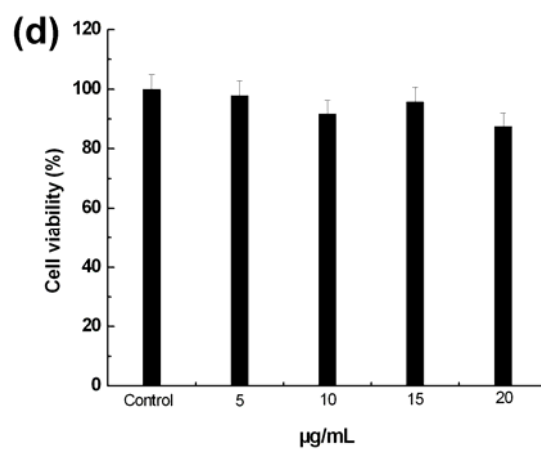

Supplement: c1jm12535d.pdf [file c1jm12535d.pdf]
